# Supplementary material for: Brief Local Application of Progesterone via a Wearable Bioreactor Induces Long-Term Regenerative Response in Adult Xenopus Hindlimb
Source: PubMed Central journal article supplement — Cell Rep. Author manuscript; Available in PMC 2019 Jan 3. (PMC6317729; doi:10.1016/j.celrep.2018.10.010), 2018-11-06
Supplement: NIHMS1512133-supplement-1.pdf [file NIHMS1512133-supplement-1.pdf]

Cell Reports, Volume 25

## Supplemental Information

### **Brief Local Application of Progesterone via a Wearable Bioreactor Induces Long-Term Regenerative Response in Adult *Xenopus* Hindlimb**

**Celia Herrera-Rincon, Annie S. Golding, Kristine M. Moran, Christina Harrison, Christopher J. Martyniuk, Justin A. Guay, Julia Zaltsman, Hayley Carabello, David L. Kaplan, and Michael Levin**

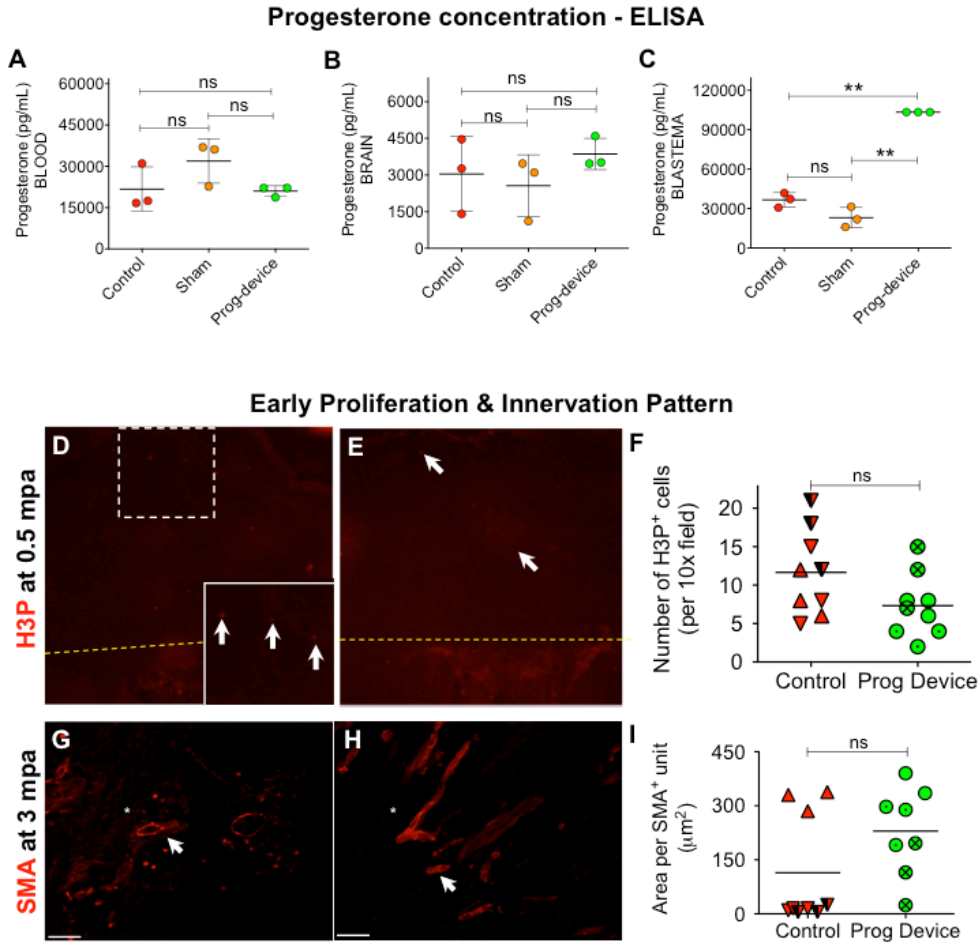

**Supplementary Fig. S1. Early response to device attachment: Progesterone levels and proliferation & innervation patterns**, Related to Figure 1.

**A-C.** Progesterone levels in the three experimental groups 24 hours after amputation and device attachment, measured via ELISA both at remote tissues (A&B, blood and brain) and at injury site (C, blastema). Control (untreated after amputation), Sham (only-device treated after amputation) and Prog-device (combined progesterone-loaded device treated after amputation) animals are represented in red, orange and green, respectively. Values are represented with scatter plots, where each dot represents the average value of three biological replicates ( $n=6$  animals per replicate and experimental group). Horizontal lines indicate mean  $\pm$  sd.  $P$  values after Bonferroni's post-hoc test (One-way ANOVA  $P > 0.05$  for A&B, and  $P < 0.01$  for C) are indicated as \*\*  $P < 0.01$ , ns: no significant difference. **D-F.** Cell proliferation (after H3P immunofluorescence) in the early fibroblastema (0.5 mpa) of untreated Control (D) and treated Prog-device (E) animals. At this stage, the proliferative response after amputation is weakly starting and no significant differences in the number of H3P-positive cells were detected between groups. In D, the bottom-right insert corresponds to the dashed-white line. Amputation plane is indicated with an orange-dashed line. **G-I.** The presence of organized blood vessels, following the longitudinal axis, was a landmark for Prog-device late blastemas (3 mpa; white asterisk in H compared to G), although not significant differences were obtained after group comparisons.

Scale bar = 100  $\mu\text{m}$ . G,H: Amputation plane is left, lateral is up. F, I: Values are represented with scatter plots, where each dot represents one histological section, and each dot style represents one animal. Horizontal line indicates mean. *P* values after *t*-test are indicated as ns: no significant difference.

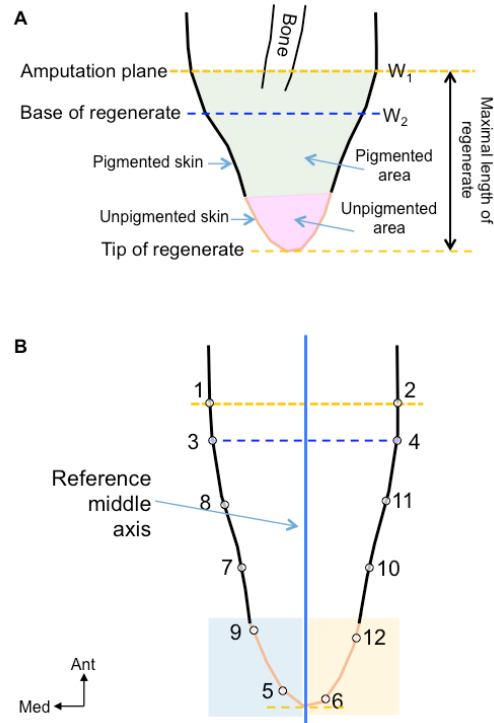

**Supplementary Fig. S2. Assessment of the regenerated soft tissue**, Related to STAR Methods and Figure 2.

**A.** Diagram of a prototypical 2-mpa regenerate showing the biological meaningful elements and morphometric parameters used to evaluate the limb outcome over time: percentage of width change ( $W_2$  respect to  $W_1$ ; WID), percentage of unpigmented area (respect to the total regenerated area; UNA), and maximal length of the regenerate (LEN). WID: Before amputation, the limb has a constant width. This situation is not maintained after amputation and tissues start to narrow while outgrowth is progressing. A lower percentage of width change is, hence, an indicative of regenerative ability, as regenerate is closer to the original morphology, previous amputation. We evaluate the decrease in width experienced by the limb as consequence of the amputation by means of the percentage of change between two width values, before ( $W_1$ , width at amputation plane, orange-dashed line) and after ( $W_2$ , width at the base of the regenerate, blue-dashed line) amputation, with the formula  $WID = (W_2 - W_1) * 100 / W_1$ . UNA: This variable quantifies the differences in pigmentation pattern of the regenerate, by means of the percentage of total regenerated area that is covered by unpigmented epidermis. To this, firstly, we calculated the total area regenerated (from the amputation plane to the tip of regenerate; green and pink surfaces in diagram, respectively). Secondly, a straight line indicating the demarcation of the totally unpigmented portion from the rest of the limb was drawn. Then, the area of the regenerate under that line (unpigmented area) was divided by the total area, with the formula  $UNA = \text{unpigmented area} / (\text{pigmented} + \text{unpigmented area}) * 100$ . LEN: We evaluate the maximal length of the regenerate by calculating the distance from the amputation plane to the plane set by the tip of the regenerate (distance between the two orange-dashed lines). To avoid size noise, this value was normalized to the total animal length (or distance from snout to vent, TOT LEN). This morphometric analysis

was performed on regenerates belonging each experimental group (Control and Prog-device, respectively) at five selected times for a 9.5-month period: 0.5, 1, 2.5, 5, 7.5 and 9.5 months post amputation (mpa). Representative images and graphs are indicated in Fig. 2A, B. **B.** Diagram of a prototypical 7.5-mpa regenerate including the positions of the twelve landmarks used for the geometric morphometrics analysis. To describe and quantify the changes in shape of the regenerate between Control and Prog-device groups, we employed MorphoJ software (Klingenberg, 2011), as extensively detailed in (Mondia et al., 2011). MorphoJ performs a geometric morphometric analysis based on landmarks or points used to define the profile of a shape. For our analysis, twelve landmarks defined each regenerate profile: the first six landmarks were biologically meaningful positions: 1 and 2 define the amputation plane, 3 and 4 for the base of the regenerate, 5 and 6 define the points at the tip of the regenerate. The other six points were semi-landmarks, chosen by successively finding the midpoints between the previous positions, as indicated by the numbers in the diagram. Landmarks were placed on digital images using ImageJ. MorphoJ is freely available from [http://www.flywings.org.uk/MorphoJ\\_page.htm](http://www.flywings.org.uk/MorphoJ_page.htm). A reference axis, passing through the middle point of a straight line linking landmarks 1 and 2, was placed on each profile. This axis was used to evaluate the curvature at the tip of the regenerate. This parameter was included as criterion for the regeneration Index. Curvature was considered *positive* when the four most distal landmarks (9, 12, 5 and 6) were situated on the same lateral plane (right or left) respect to the middle axis. In this example diagram, 9 and 5 are on left plane (blue square), as 12 and 6 are on the right one (orange square). The tip morphology of the illustrative diagram would be considered *negative* for the variable curvature.

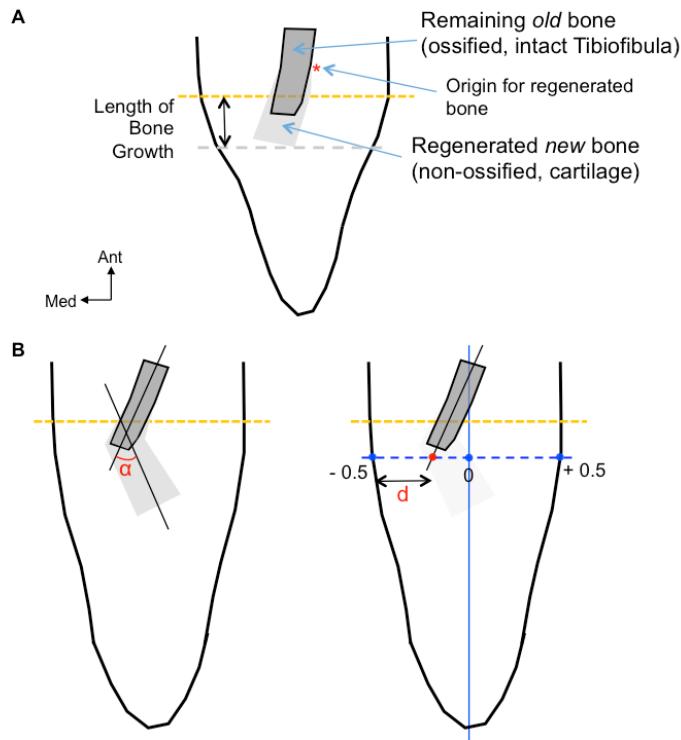

**Supplementary Fig. S3. Assessment of the bone growth and its reintegration with the remaining tissues**, Related to STAR Methods and Figure 2C.

**A.** Diagram of a prototypical 2-mpa regenerate, under X-ray image, showing the biological meaningful elements and morphometric parameters used to evaluate the skeletal outcome over time: maximal length of bone from the amputation plane (BLEN; Table 1) and maximal area occupied by *new* bone growth (mostly non-ossified bone or regenerated cartilage, BAREA; Table 1). Responsive animals generated the same bone growth pattern as displayed in the graphic. The skeletal regrowth origin began above the plane of amputation, indicating the occurrence of a secondary or spontaneous amputation (as described in mice by Muneoka's group (Fernando et al., 2011)). The secondary amputation acts as a catalyst for bone regeneration as it creates more bone resorption and degradation. The newly formed bone typically widened at its distal end and deviated from the midline of the intact tibiofibula. The morphometric analysis was performed on regenerates belonging each experimental group (Control and Prog-device, respectively) at five selected times for a 9.5-month period: 0.5, 1, 2.5, 5, 7.5 and 9.5 months post amputation (mpa). Representative images and graphs are indicated in Fig. 3 and Supplementary Fig. S4. **B.** Diagram of a prototypical 7.5-mpa regenerate, under X-ray image, including the axis used to evaluate the reintegration of the regenerated bone and remaining tissues during limb regeneration. Left, Reintegration of the regenerated new bone and the remaining old bone. We evaluated the deviation angle ( $\alpha$ ) formed under the intersection between the middle line of the new bone growth and the middle line of the remaining bone (longitudinal axis of the tibiofibula). Right, The geometric intersection between the middle line of the intact tibiofibula bone and the plane set by the base of the regenerate was taken for evaluating the old-bone displacement ( $d$ ) over the course of the

regeneration, from the longitudinal axis to the medial edge of the soft tissue. This morphometric analysis was performed on regenerates belonging each experimental group (Control and Prog-device, respectively). Representative images and graphs are indicated in Fig. 2C-2E.

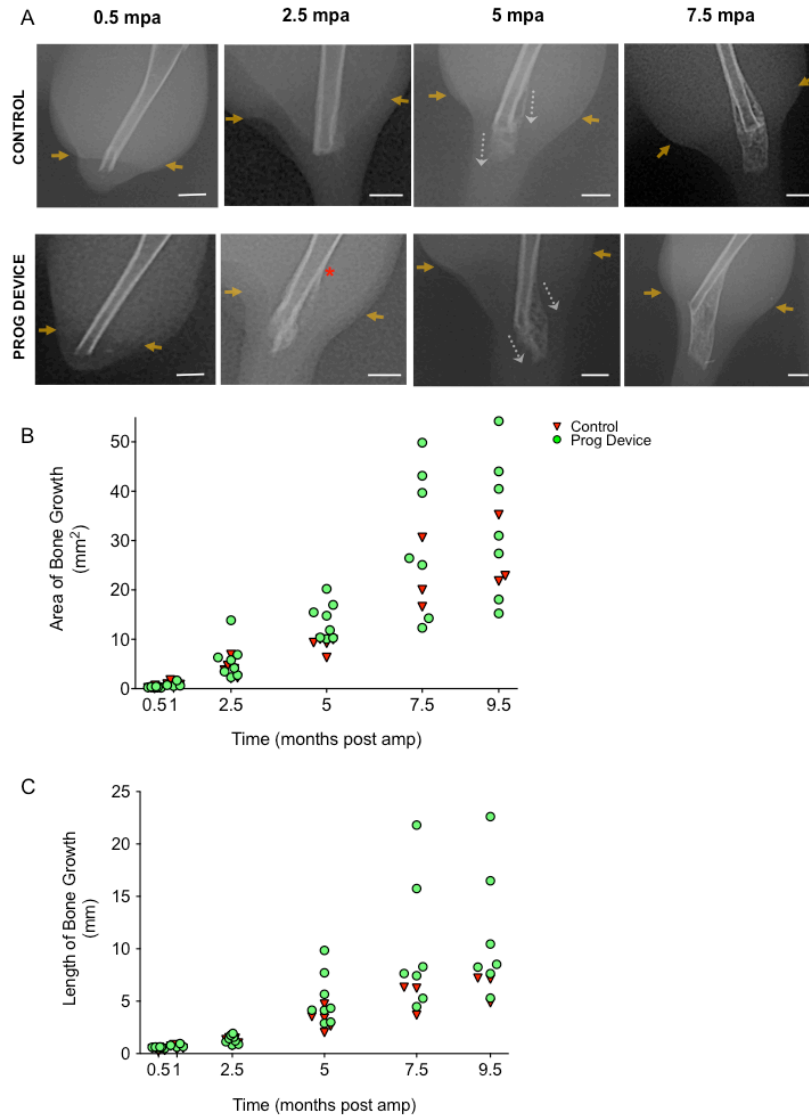

**Supplementary Fig. S4. Bone patterning as seen under X-ray images over a 9.5-month regenerative period, Related to Figure 2.**

**A.** The morphometric analysis was performed on regenerates belonging each experimental group, Control (top) and Prog-device (bottom), at five selected times for a 9.5-month period: 0.5, 1, 2.5, 5, 7.5 and 9.5 months post amputation (mpa). The lateral brown arrows indicate amputation plane. As soon as 2.5 mpa, new bone growth above the amputation plane (red asterisk) is detected in treated animals, suggesting that the necessary catalyst for bone regeneration (as it creates more bone resorption and degradation) is enhanced by treatment. **B, C.** Overall, treated animals show a tendency for bigger area (B) and longer (C) new bone growth. As might be expected with the variability of genetic background, individual animals are clearly observed to be strong treatment ‘Responders’, while other treated animals behaved as ‘Non-responders’, similar to individuals in Control group. See Supplementary Fig. S2 for details and meaning of the



measurements. Scale bar = 0.5 cm. Values are represented with scatter plots, where each dot represents one animal.

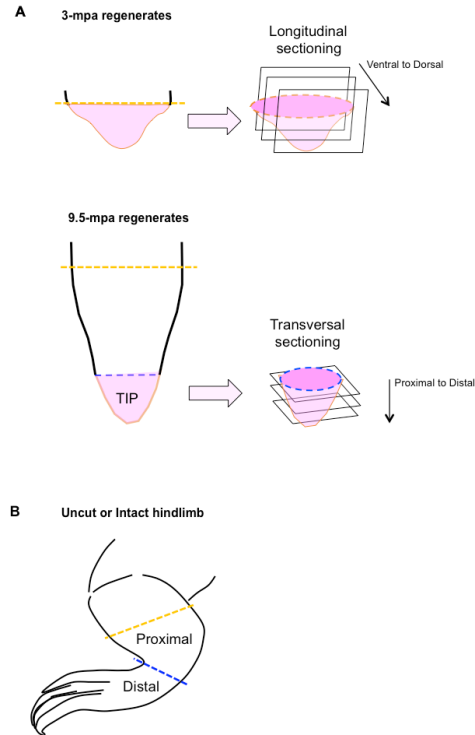

**Supplementary Fig. S5. Experimental design and section axis for histological processing of the regenerates (A) and the uncut or intact frog hindlimb (B),** Related to Figure 1 & Figure 4

**A.** *Top*, Drawing represent a short-term regenerate, indicating plane for tissue harvesting (orange-dashed line indicates the original amputation site) and longitudinal sectioning, following the ventral-to-dorsal axis. *Bottom*, The most distal portion of the 9.5-mpa regenerates (or tips) were recut approximately 2 cm below the original amputation plane (dashed-blue line indicates plane for recutting and orange-dashed line indicates the original amputation plane). Tips were sectioned along the transversal plane, obtaining cross sections (dashed-blue line) for histological analysis. **B.** Tips of 9.5-mpa regenerates were morphologically compared to the uncut or intact limb. Two different levels of the uncut limb were separately cross-sectioned, immunostained and analyzed: proximal or distal respect to the regular level for the amputation plane (orange-dashed line).

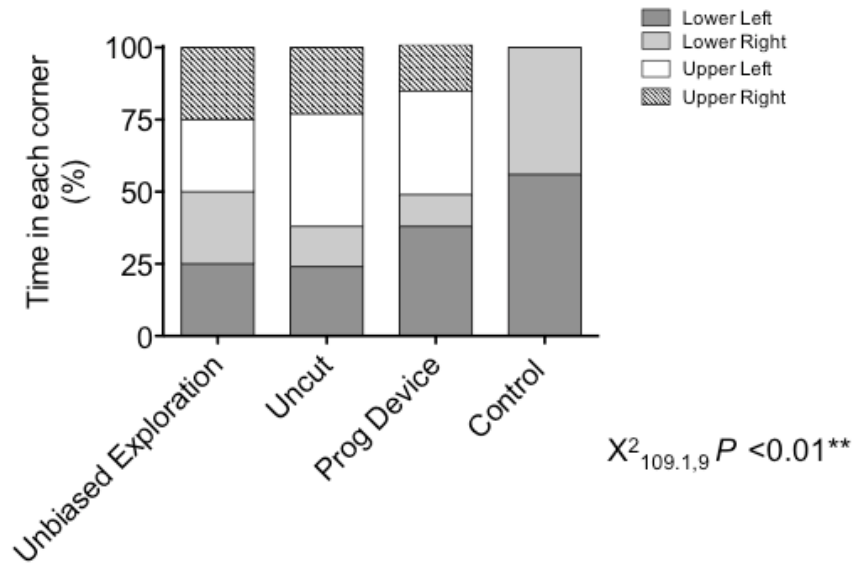

**Supplementary Fig. S6. Behavioral observations of exploration and positional information, Related to Figure 5.** Contingency analysis for the mean percentage of time spent in each quadrant per experimental group.  $P < 0.01$  for  $X^2_{(0.05, 9)} = 109.1$ .

Common cell processes and gene networks down-regulated in both Sham and Prog-device groups

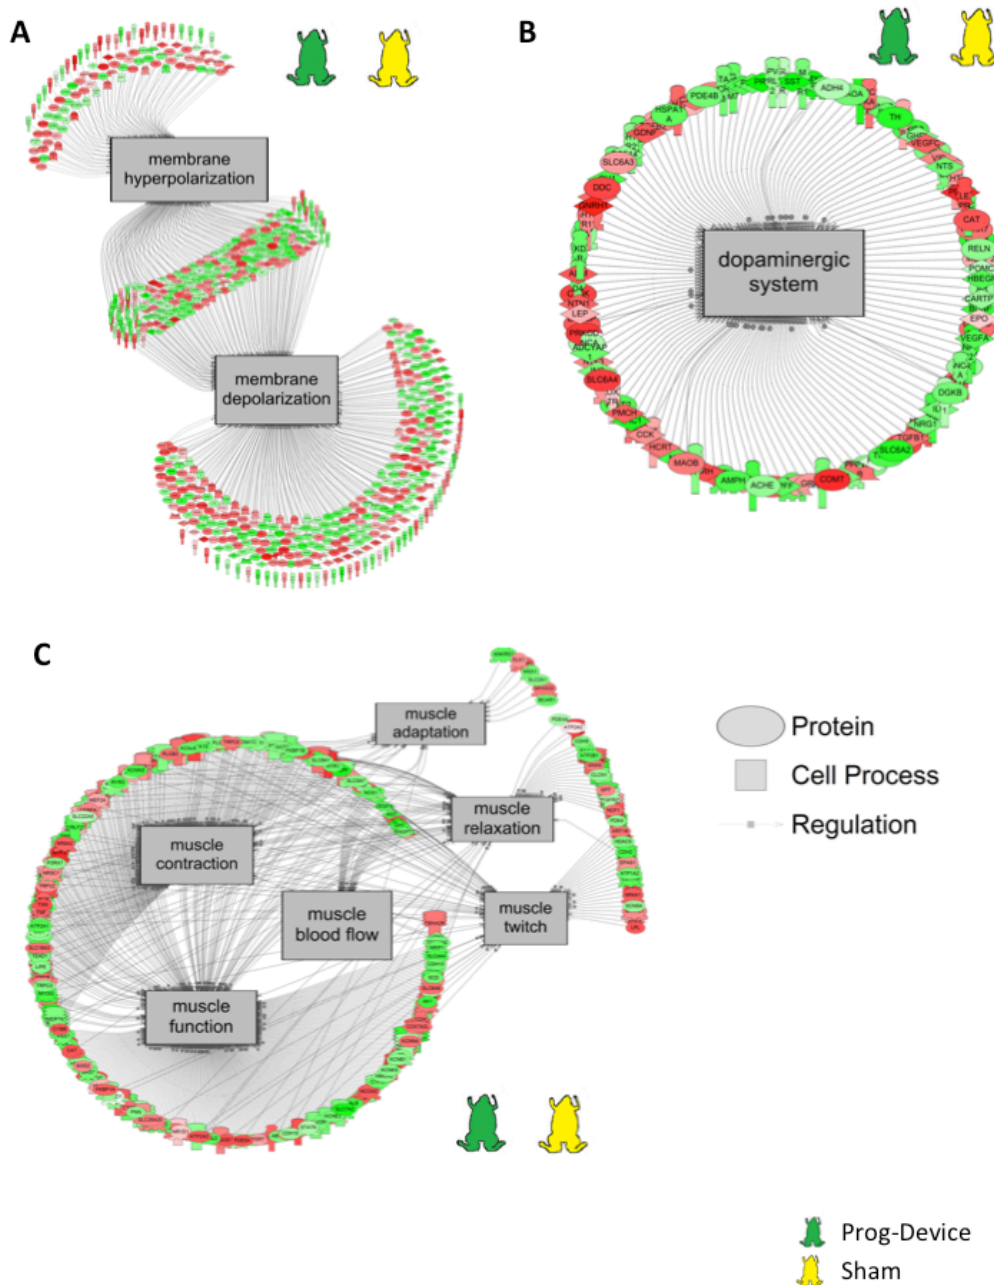

**Supplementary Fig. S7. Common down-regulated cell processes and gene networks for both Sham and Prog-device treatments. Related to Figures 6 & 7.** Subnetwork enrichment analysis of blastema exposed to only hydrogel device (Sham group) or combined hydrogel plus drug (Prog-Device group) identified common down-regulated pathways involved in (A) changes in membrane potential, (B) dopaminergic system and (C) muscle physiology. Complete data are presented in Appendix 1. All genes within a pathway are located in Appendix 2. Green = down gene, Red = up gene.

**Supplementary Table 1. Summary of parameters and variables used to analyze and quantify the regenerated pattern of adult *Xenopus* hindlimb after amputation, Related to STAR Methods.**

| Abbreviation | Measurement                                                                                | Analysis details                                                                                                                                                                                                                                                           | Formula                                                                                                           | Figure                          |
|--------------|--------------------------------------------------------------------------------------------|----------------------------------------------------------------------------------------------------------------------------------------------------------------------------------------------------------------------------------------------------------------------------|-------------------------------------------------------------------------------------------------------------------|---------------------------------|
| WID          | Percentage of width change                                                                 | Percentage decrease between the width at the base of the regenerate ( $W_2$ ) and the width at amputation plane ( $W_1$ ).                                                                                                                                                 | $(W_2 - W_1) * 100 / W_1$                                                                                         | Fig. 2A, 2B & Suppl. Fig. S2A   |
| UNA          | Unpigmented Area                                                                           | Percentage of the total regenerated area that is covered by unpigmented skin                                                                                                                                                                                               | $\frac{\text{pigmented area} + (\text{pigmented area} + \text{unpigmented area}) * 100}{\text{unpigmented area}}$ | Fig. 2A, 2B & Suppl. Fig. S2A   |
| LEN          | Maximal length of the regenerate (normalized to the total animal length or TOT LEN)        | Distance from the amputation plane to the plane set by the tip of the regenerate                                                                                                                                                                                           | LEN/TOT LEN                                                                                                       | Fig. 2A, 2B & Suppl. Fig. S2A   |
| SHAPE        | Shape characterization                                                                     | Geometric morphometric analysis based on twelve landmarks or points used to define the profile of the shape of the regenerate                                                                                                                                              | MorphoJ software                                                                                                  | Fig. 3E                         |
| LEN RATIO    | Regenerated vs. Uncut Length Ratio                                                         | Quantification of regenerated limb length ( $a' + b'$ ; $a'$ = length from the knee to the amputation plane, $b'$ = LEN = length from the amputation plane to the tip) relative to the contralateral uncut limb ( $a + b$ ; $a$ = tibiofibula length, $b$ = tarsus length) | $(a' + b') / (a + b)$                                                                                             | Fig. 3G                         |
| CURVE at tip | Deviation of the tip of regenerate from the reference middle axis                          | Curvature is considered <i>positive</i> when the four most distal landmarks (9, 12, 5 and 6) are situated on the same lateral plane (right or left) respect to the reference middle axis                                                                                   | Categorical variable (n/a)                                                                                        | Suppl. Fig. S2B                 |
| BLEN         | Maximal length of bone growth from the amputation plane (either ossified and non-ossified) | Distance from the amputation plane to the plane set by the most distal part of the regenerated cartilage                                                                                                                                                                   | ImageJ on X-ray image                                                                                             | Suppl. Fig. S3A & Suppl. Fig. 4 |
| BAREA        | Maximal area occupied by <i>new</i> bone growth (non-ossified)                             | Maximal surface occupied by new bone, without considering amputation plane as the origin, given that regenerate skeletogenesis starts above the amputation plane                                                                                                           | ImageJ on X-ray image                                                                                             | Suppl. Fig. S3A & Suppl. Fig. 4 |
| $\alpha$     | Angle deviation of the new bone growth respect to the remaining old bone                   | Deviation angle formed under the intersection between the middle line of the new bone growth and the middle line of the remaining bone                                                                                                                                     | ImageJ on X-ray image                                                                                             | Fig. 2 & Suppl. Fig. S3B (Left) |

|      |                                                                                           |                                                                                                                                                                                                                                                            |                                                                                          |                                  |
|------|-------------------------------------------------------------------------------------------|------------------------------------------------------------------------------------------------------------------------------------------------------------------------------------------------------------------------------------------------------------|------------------------------------------------------------------------------------------|----------------------------------|
| d    | Displacement (reorganization) of the remaining bone from the middle line after amputation | Geometric intersection between the middle line of the intact tibiofibula bone and the plane set by the base of the regenerate was taken for evaluating the bone deviation from the longitudinal axis (d=0) to the medial edge of the soft tissue (d= -0.5) | Image] on X-ray image                                                                    | Fig. 2 & Suppl. Fig. S3B (Right) |
| ADPT | Mechanosensitive adaptation                                                               | Presence/absence of response motor to one touch stimulus applied 30 seconds after the first one. Both stimuli are applied with toothless-smooth tip forceps in the same direction and with the same weak pressure                                          | Categorical variable (n/a)                                                               |                                  |
| MOV  | Efficient motor activity level                                                            | Number of efficient movements per 3-min interval. Only movements implying trajectory displacement (swimming between corners, to the water-air surface, etc) were quantified.                                                                               | Counting of number of active movements per 3-min video                                   | Fig. 5A                          |
| RI   | Regeneration Index                                                                        | The RI is a numerical score designed for evaluating the regenerative capacity of Xenopus hindlimb. RI ranges from 0 (typical hypomorphic spike, low regenerative ability) to 10 (patterned limb-like regenerates, high regenerative ability).              | $RI = 3 \cdot x_1 + 2 \cdot x_2 + 2 \cdot x_3 + 1 \cdot x_4 + 1 \cdot x_5 + 1 \cdot x_6$ | Fig. 3F & Suppl. Tables 1&2      |

**Supplementary Table 2. Regeneration Index (RI) scores for individual animals at 2.5 mpa.** Related to STAR Methods and Figure 3.

The RI is a numerical score [calculated by the weighted formula  $RI = 3 \cdot x_1 + 2 \cdot x_2 + 2 \cdot x_3 + 1 \cdot x_4 + 1 \cdot x_5 + 1 \cdot x_6$ ] designed for evaluating the regenerative capacity of *Xenopus* hindlimb. RI ranges from 0 (typical hypomorphic spike, low regenerative ability) to 10 (patterned limb-like regenerates, high regenerative ability). Ctrl: untreated Control; PD: Progesterone-device treated animals

|                |       | <b>WID ≤ -<br/>50%<br/>(x<sub>1</sub>)</b> | <b>UNA ≥<br/>30%<br/>(x<sub>2</sub>)</b> | <b>MaxWID<br/>≥ W1<br/>(x<sub>3</sub>)</b> | <b>CURVE at<br/>tip<br/>(x<sub>4</sub>)</b> | <b>SecBONE<br/>AMP<br/>(x<sub>5</sub>)</b> | <b>ADPT<br/>(x<sub>6</sub>)</b> | <b>RI</b> |
|----------------|-------|--------------------------------------------|------------------------------------------|--------------------------------------------|---------------------------------------------|--------------------------------------------|---------------------------------|-----------|
| <b>CONTROL</b> | Ctrl1 | -65%<br>(0)                                | 22%<br>(0)                               | No<br>(0)                                  | no<br>(1)                                   | No<br>(0)                                  | No<br>(0)                       | 1         |
|                | Ctrl2 | -58%<br>(0)                                | 23%<br>(0)                               | No<br>(0)                                  | Yes<br>(0)                                  | No<br>(0)                                  | Yes<br>(1)                      | 1         |
|                | Ctrl3 | -55%<br>(0)                                | 23%<br>(0)                               | No<br>(0)                                  | No<br>(1)                                   | Yes<br>(1)                                 | Yes<br>(1)                      | 3         |
|                | Ctrl4 | -54%<br>(0)                                | 18%<br>(0)                               | No<br>(0)                                  | Yes<br>(0)                                  | Yes<br>(1)                                 | No<br>(0)                       | 1         |
|                | Ctrl5 | -63%<br>(0)                                | 13%<br>(0)                               | No<br>(0)                                  | No<br>(1)                                   | Yes<br>(1)                                 | Yes<br>(1)                      | 3         |
|                | Ctrl6 | -55%<br>(0)                                | 21%<br>(0)                               | No<br>(0)                                  | No<br>(1)                                   | No<br>(0)                                  | No<br>(0)                       | 1         |
|                | Ctrl7 | -56%<br>(0)                                | 12%<br>(0)                               | No<br>(0)                                  | yes<br>(0)                                  | No<br>(0)                                  | No<br>(0)                       | 0         |

|                    |     |             |            |            |            |            |            |    |
|--------------------|-----|-------------|------------|------------|------------|------------|------------|----|
| <b>PROG DEVICE</b> | PD1 | -7%<br>(1)  | 50%<br>(1) | No<br>(0)  | No<br>(1)  | No<br>(0)  | Yes<br>(1) | 7  |
|                    | PD2 | -39%<br>(1) | 50%<br>(1) | Yes<br>(1) | No<br>(1)  | Yes<br>(1) | Yes<br>(1) | 10 |
|                    | PD3 | -61%<br>(0) | 34%<br>(1) | No<br>(0)  | Yes<br>(0) | Yes<br>(1) | Yes<br>(1) | 4  |
|                    | PD4 | -47%<br>(1) | 27%<br>(0) | No<br>(0)  | No<br>(1)  | Yes<br>(1) | No<br>(0)  | 5  |
|                    | PD5 | -28%<br>(1) | 39%<br>(1) | Yes<br>(1) | No<br>(1)  | Yes<br>(1) | Yes<br>(1) | 10 |
|                    | PD6 | -58%<br>(0) | 11%<br>(0) | No<br>(0)  | No<br>(1)  | No<br>(0)  | Yes<br>(1) | 2  |
|                    | PD7 | -44%<br>(1) | 31%<br>(1) | Yes<br>(1) | No<br>(1)  | Yes<br>(1) | Yes<br>(1) | 10 |
|                    | PD8 | -27%<br>(1) | 41%<br>(1) | Yes<br>(1) | No<br>(1)  | Yes<br>(1) | Yes<br>(1) | 10 |
|                    | PD9 | -52%<br>(0) | 57%<br>(1) | No<br>(0)  | No<br>(1)  | No<br>(0)  | Yes<br>(1) | 4  |



**Supplementary Table 3. Regeneration Index (RI) scores for individual animals at 9.5 mpa.** Related to STAR Methods and Figure 3

The RI is a numerical score [calculated by the weighted formula  $RI = 3 \cdot x_1 + 2 \cdot x_2 + 2 \cdot x_3 + 1 \cdot x_4 + 1 \cdot x_5 + 1 \cdot x_6$ ] designed for evaluating the regenerative capacity of *Xenopus* hindlimb. RI ranges from 0 (typical hypomorphic spike, low regenerative ability) to 10 (patterned limb-like regenerates, high regenerative ability). Ctrl: untreated Control; PD: Progesterone-device treated animals.

|                    |       | <b>WID ≤ -<br/>50%<br/>(x<sub>1</sub>)</b> | <b>UNA ≥<br/>10%<br/>(x<sub>2</sub>)</b> | <b>MaxWID ≥<br/>W1<br/>(x<sub>3</sub>)</b> | <b>CURVE at<br/>tip<br/>(x<sub>4</sub>)</b> | <b>BONE<br/>AREA ≥<br/>30%<br/>(x<sub>5</sub>)</b> | <b>ADPT<br/>(x<sub>6</sub>)</b> | <b>RI</b> |
|--------------------|-------|--------------------------------------------|------------------------------------------|--------------------------------------------|---------------------------------------------|----------------------------------------------------|---------------------------------|-----------|
| <b>CONTROL</b>     | Ctrl1 | -57%<br>(0)                                | 4%<br>(0)                                | No<br>(0)                                  | Yes<br>(0)                                  | 35%<br>(1)                                         | Yes<br>(1)                      | 2         |
|                    | Ctrl2 | -66%<br>(0)                                | 3%<br>(0)                                | No<br>(0)                                  | No<br>(1)                                   | 23%<br>(0)                                         | No<br>(0)                       | 1         |
|                    | Ctrl3 | -62%<br>(0)                                | 4%<br>(0)                                | No<br>(0)                                  | Yes<br>(0)                                  | 22%<br>(0)                                         | No<br>(0)                       | 0         |
| <b>PROG-DEVICE</b> | PD1   | -53%<br>(0)                                | 11%<br>(1)                               | No<br>(0)                                  | No<br>(1)                                   | 18%<br>(0)                                         | Yes<br>(1)                      | 4         |
|                    | PD2   | -39%<br>(1)                                | 16%<br>(1)                               | No<br>(0)                                  | No<br>(1)                                   | 41%<br>(1)                                         | Yes<br>(1)                      | 8         |
|                    | PD3   | -64%<br>(0)                                | 8%<br>(0)                                | no<br>(0)                                  | No<br>(1)                                   | 31%<br>(1)                                         | Yes<br>(1)                      | 3         |
|                    | PD4   | -46%<br>(0)                                | 14%<br>(0)                               | No<br>(0)                                  | No<br>(1)                                   | 27%<br>(1)                                         | Yes<br>(1)                      | 7         |

|  |     |      |     |     |     |     |     |    |
|--|-----|------|-----|-----|-----|-----|-----|----|
|  |     | (1)  | (1) | (0) | (1) | (0) | (1) |    |
|  | PD5 | -47% | 19% | Yes | Yes | 44% | Yes | 10 |
|  |     | (1)  | (1) | (1) | (1) | (1) | (1) |    |
|  | PD6 | -49% | 8%  | No  | No  | 15% | Yes | 5  |
|  |     | (1)  | (0) | (0) | (1) | (0) | (1) |    |
|  | PD7 | -43% | 20% | Yes | No  | 54% | Yes | 10 |
|  |     | (1)  | (1) | (1) | (1) | (1) | (1) |    |

**Supplementary Table 4. Quantitative measurements for nerve fibers (Tubulin) and vessels (SMA) on cross sections of 9.5-mpa tips of regenerates for Control (amputated untreated) and Prog-device (amputated treated) vs. Uncut (unamputated) limbs. Related to Figure 4.**

Values are presented as mean  $\pm$  s.d. Values for uncut limb correspond to measurements done on 10 sections of two different animals. Proximal and distal are referred to the distance from the amputation plane level (see Supplementary Fig. S5B for illustration).

|                           | Tubulin          |                                  |                            | SMA              |                                  |                               |
|---------------------------|------------------|----------------------------------|----------------------------|------------------|----------------------------------|-------------------------------|
|                           | Number/s<br>lice | Area/unit<br>( $\mu\text{m}^2$ ) | Area occupied<br>(%/slice) | Number/s<br>lice | Area/unit<br>( $\mu\text{m}^2$ ) | Area<br>occupied<br>(%/slice) |
| <b>Control</b>            | 109 $\pm$ 38     | 351 $\pm$ 168                    | 2 $\pm$ 1                  | 24 $\pm$ 10      | 451 $\pm$ 206                    | 0.4 $\pm$ 0                   |
| <b>Prog-Device</b>        | 289 $\pm$ 119    | 972 $\pm$ 515                    | 10 $\pm$ 3                 | 90 $\pm$ 50      | 695 $\pm$ 327                    | 2.2 $\pm$ 1.2                 |
| <b>Uncut<br/>Proximal</b> | 88 $\pm$ 30      | 2362 $\pm$ 233                   | 8 $\pm$ 3                  | 65 $\pm$ 13      | 1160 $\pm$ 227                   | 0.5 $\pm$ 0.3                 |
| <b>Uncut Distal</b>       | 209 $\pm$ 25     | 1582 $\pm$ 155                   | 12 $\pm$ 1                 | 92 $\pm$ 21      | 870 $\pm$ 120                    | 1.4 $\pm$ 0.7                 |

**Supplementary Table 5. Raw reads and unique sequences aligned to *Xenopus*, as well as the percentage of uniquely mapped reads for each of the 9 blastema samples. Related to STAR Methods and Figures 6 & 7**

| Samples              | Raw_Reads_Num | Unique_Aligned | Uniquely mapped reads % |
|----------------------|---------------|----------------|-------------------------|
| D18-3349_Sham 1      | 4183730       | 2299797        | 57.61%                  |
| D18-3350_Sham 2      | 4764212       | 2661956        | 58.33%                  |
| D18-3351_Sham 3      | 3989349       | 2084680        | 54.91%                  |
| D18-3358_Prog 1      | 5912683       | 3926416        | 68.34%                  |
| D18-3359_Prog 2      | 4517872       | 2471849        | 57.39%                  |
| D18-3360_Prog 3      | 5125074       | 3249883        | 65.64%                  |
| D18-3367_No device 1 | 4682793       | 2800421        | 62.77%                  |
| D18-3368_No device 2 | 4076875       | 2139389        | 55.44%                  |
| D18-3369_No device 3 | 5446437       | 3460304        | 65.74%                  |

**Supplementary Table 6. List of differentially expressed genes in blastema of Sham and Progesterone-device treatments, compared to Control group, respectively.** Genes depicted are those that show greater than log2 fold change of 4. All differentially expressed genes can be found in Appendix S1. **Related to Figure 7**

| Treatment                     | Gene Name                                                                        | Gene ID      | log2 Fold change | p-value (FDR) |
|-------------------------------|----------------------------------------------------------------------------------|--------------|------------------|---------------|
| <b>Sham</b>                   | NADH dehydrogenase [ubiquinone] 1 beta subcomplex subunit 10-like                | LOC108718674 | -7.24            | 3.69E-02      |
|                               | zinc finger protein 850-like                                                     | LOC108718435 | -7.12            | 4.37E-02      |
|                               | enhancer of polycomb homolog 1-like                                              | LOC108719842 | -5.92            | 4.53E-02      |
|                               | ras related glycolysis inhibitor and calcium channel regulator                   | rrad         | -4.75            | 1.37E-02      |
|                               | kelch like family member 34                                                      | klhl34       | -4.50            | 1.10E-02      |
|                               | actin related gene 3                                                             | act3         | -4.38            | 5.20E-03      |
|                               | pancreatic progenitor cell differentiation and proliferation factor-like protein | LOC108719245 | -4.23            | 1.31E-02      |
|                               | alpha-actinin-3                                                                  | LOC108715125 | -4.21            | 1.37E-02      |
|                               | adenylate kinase 1                                                               | ak1          | -4.20            | 3.41E-03      |
|                               | parvalbumin                                                                      | pvalb        | -4.18            | 3.60E-02      |
|                               | myozenin 1                                                                       | myoz1        | -4.16            | 8.84E-03      |
|                               | RNA binding motif protein 24                                                     | rbm24        | -4.15            | 4.32E-02      |
|                               | troponin C2, fast skeletal type                                                  | tnnc2        | -4.12            | 4.57E-02      |
|                               | ras related glycolysis inhibitor and calcium channel regulator                   | rrad         | -4.08            | 2.13E-03      |
|                               | Y-box binding protein 3                                                          | ybx3         | -4.01            | 1.37E-02      |
|                               | SMAD family member 4                                                             | smad4        | 5.63             | 3.60E-02      |
|                               | olfactory receptor 51L1-like                                                     | LOC108709051 | 6.39             | 3.72E-02      |
| capZ-interacting protein-like | LOC108707388                                                                     | 7.15         | 7.55E-03         |               |
|                               |                                                                                  |              |                  |               |
| <b>Prog-Device</b>            | prolactin                                                                        | prl          | -7.30            | 4.18E-02      |
|                               | myosin light chain 4                                                             | myl4         | -6.91            | 3.65E-02      |
|                               | arginine vasopressin                                                             | avp          | -6.72            | 2.87E-03      |
|                               | LBH domain containing 1                                                          | lbhd1        | -6.52            | 8.55E-04      |

|  |                                                                     |              |       |          |
|--|---------------------------------------------------------------------|--------------|-------|----------|
|  | unknown                                                             | LOC108701576 | -6.43 | 2.46E-03 |
|  | carcinoembryonic antigen-related cell adhesion molecule 19-like     | LOC108696713 | -6.41 | 1.71E-03 |
|  | ELMO domain containing 1                                            | elmod1       | -6.38 | 1.45E-03 |
|  | ryncolin-1-like                                                     | LOC108698848 | -6.07 | 2.09E-02 |
|  | olfactory receptor family 52 subfamily D member 1                   | or52d1       | -5.98 | 2.70E-02 |
|  | RAS like family 12                                                  | rasl12       | -5.82 | 2.02E-02 |
|  | unknown                                                             | LOC108699555 | -5.67 | 2.26E-02 |
|  | carbonic anhydrase 12                                               | ca12         | -5.67 | 1.96E-02 |
|  | uncharacterized protein C7orf50 homolog                             | LOC108701567 | -5.67 | 1.95E-02 |
|  | somatostatin                                                        | sst          | -5.63 | 2.56E-02 |
|  | mannosidase beta like                                               | manbal       | -5.61 | 4.58E-02 |
|  | cholinergic receptor nicotinic alpha 7 subunit                      | chrna7       | -5.50 | 3.55E-02 |
|  | kelch like family member 40                                         | klhl40       | -5.50 | 4.63E-06 |
|  | CUGBP Elav-like family member 4                                     | celf4        | -5.36 | 4.87E-02 |
|  | unknown                                                             | LOC108708284 | -5.36 | 4.77E-02 |
|  | myozenin 2                                                          | myoz2        | -5.35 | 4.60E-02 |
|  | solute carrier family 1 member 3                                    | slc1a3       | -5.13 | 9.69E-04 |
|  | unknown                                                             | LOC108719658 | -5.12 | 8.85E-04 |
|  | seizure related 6 homolog like 2                                    | sez6l2       | -4.67 | 9.49E-05 |
|  | HEAT repeat-containing protein 3-like                               | LOC108713990 | -4.52 | 3.81E-03 |
|  | CUB and sushi domain-containing protein 3-like                      | LOC108719756 | -4.38 | 5.93E-04 |
|  | phospholipid transfer protein                                       | pltp         | -4.27 | 3.13E-03 |
|  | xin actin binding repeat containing 1                               | xirp1        | -4.18 | 7.37E-03 |
|  | cadherin 12                                                         | cdh12        | -4.05 | 6.24E-03 |
|  | ATPase Na <sup>+</sup> /K <sup>+</sup> transporting subunit alpha 3 | atp1a3       | -4.00 | 7.42E-03 |
|  | interleukin-8-like                                                  | loc100498234 | 4.04  | 2.31E-02 |
|  | transcriptional regulator ATRX homolog                              | LOC108711024 | 4.61  | 1.39E-02 |
|  | transmembrane protein 256                                           | tmem256      | 5.55  | 3.53E-02 |
|  | poly(U)-specific endoribonuclease-D                                 | loc100497154 | 5.68  | 3.40E-02 |
|  | protein MGARP-like                                                  | LOC108706683 | 5.69  | 4.49E-02 |

|  |                                                         |              |      |          |
|--|---------------------------------------------------------|--------------|------|----------|
|  | capZ-interacting protein-like                           | LOC108707388 | 5.78 | 3.26E-02 |
|  | nuclear pore complex protein Nup214-like                | LOC108705544 | 5.78 | 1.61E-02 |
|  | multiple inositol-polyphosphate phosphatase 1 L homolog | LOC108696047 | 5.80 | 4.81E-02 |
|  | 15 kDa selenoprotein                                    | sep15        | 6.49 | 1.99E-03 |
|  | superoxide Dismutase 3                                  | sod3         | 6.53 | 1.28E-02 |
|  | histone H2B 1.2                                         | LOC108705674 | 6.87 | 1.25E-02 |
|  | unknown                                                 | LOC108700612 | 7.52 | 5.79E-03 |
